# Supplementary material for: Gut microbiota modulation with long-chain corn bran arabinoxylan in adults with overweight and obesity is linked to an individualized temporal increase in fecal propionate
Source: PubMed Central journal article supplement (PMC7439537; doi:10.1186/s40168-020-00887-w), 2020-08-19

**Additional file 1: Figure S1.**

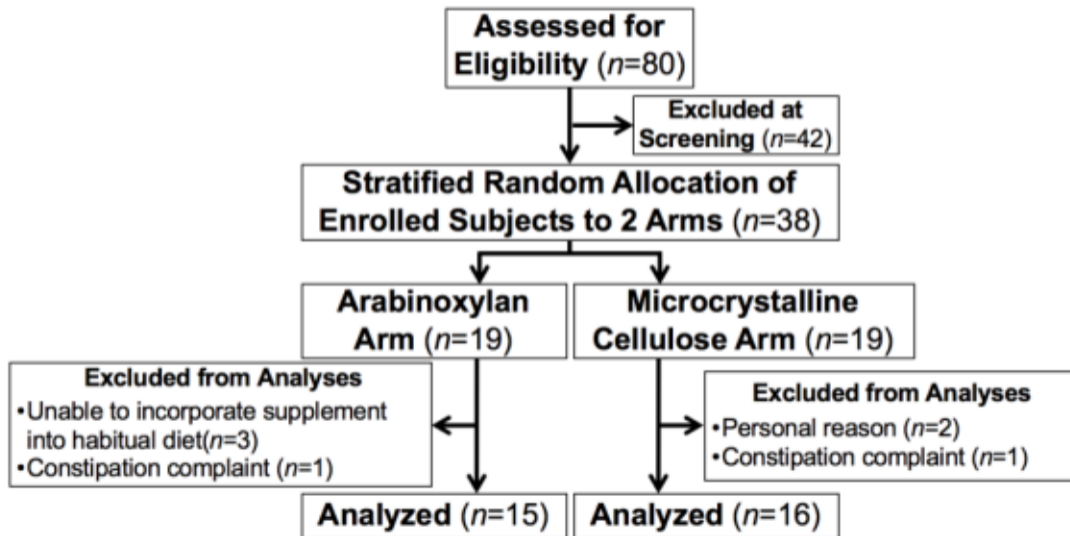

Supplement: 40168_2020_887_MOESM1_ESM.pdf [file 40168_2020_887_MOESM1_ESM.pdf]
