# Supplementary material for: Gut microbiota modulation with long-chain corn bran arabinoxylan in adults with overweight and obesity is linked to an individualized temporal increase in fecal propionate
Source: PubMed Central journal article supplement (PMC7439537; doi:10.1186/s40168-020-00887-w), 2020-08-19
Supplement: 40168_2020_887_MOESM2_ESM.pdf [file 40168_2020_887_MOESM2_ESM.pdf]

**Additional file 2: Table S1.** Subject Characteristics at Baseline<sup>1</sup>.

|                          | Arabinoxylan | Microcrystalline Cellulose | Between Group <i>p</i> value <sup>2</sup> |
|--------------------------|--------------|----------------------------|-------------------------------------------|
| Number                   | 15           | 16                         |                                           |
| Age (y)                  | 33.7 ± 9.7   | 32.1 ± 7.4                 | 0.91                                      |
| Sex (female/male)        | 10/5         | 11/5                       |                                           |
| Height (cm)              | 171.5 ± 8.4  | 168.8 ± 7.6                | 0.25                                      |
| Weight (kg)              | 84.8 ± 12.3  | 81.9 ± 10.5                | 0.40                                      |
| BMI (kg/m <sup>2</sup> ) | 28.7 ± 2.7   | 28.7 ± 2.0                 | 0.99                                      |
| Waist circumference (cm) | 95.7 ± 8.8   | 92.9 ± 6.0                 | 0.30                                      |
| Percent body fat (%)     | 33.0 ± 9.3   | 32.0 ± 7.3                 | 0.63                                      |
| Females                  | 36.4 ± 2.9   | 38.0 ± 6.1                 | 0.20                                      |
| Males                    | 22.5 ± 3.6   | 23.0 ± 5.3                 | 0.84                                      |
| Ethnicity (%)            |              |                            | 0.56                                      |
| White                    | 60.0         | 43.8                       |                                           |
| Asian                    | 20.0         | 31.3                       |                                           |
| Black                    | 13.3         | 6.3                        |                                           |
| Other                    | 6.7          | 18.8                       |                                           |
| Employment (%)           |              |                            | 0.40                                      |
| Student                  | 26.7         | 50.0                       |                                           |
| Employed                 | 66.7         | 43.8                       |                                           |
| Unemployed               | 6.7          | 6.3                        |                                           |

<sup>1</sup> Data presented as mean ± standard deviation or as a percentage.

<sup>2</sup> Continuous variables were analyzed by Mann-Whitney test, and count variables were analyzed by Chi-Squared test. BMI, body mass index.
