# Supplementary material for: Gut microbiota modulation with long-chain corn bran arabinoxylan in adults with overweight and obesity is linked to an individualized temporal increase in fecal propionate
Source: PubMed Central journal article supplement (PMC7439537; doi:10.1186/s40168-020-00887-w), 2020-08-19
Supplement: 40168_2020_887_MOESM3_ESM.pdf [file 40168_2020_887_MOESM3_ESM.pdf]

**Additional file 3: Table S2.** Abundance of Bacterial Taxa and CARGs Affected by the Dietary Interventions as Assessed by 16S rRNA Gene Amplicons Sequencing<sup>1</sup>.

| Taxonomic Group                                                                      | Proportion of bacterial taxa expressed in relative abundance (Mean ± Standard Deviation) |              |                                |              |  |                                   |             |                                |              |  |                                 |
|--------------------------------------------------------------------------------------|------------------------------------------------------------------------------------------|--------------|--------------------------------|--------------|--|-----------------------------------|-------------|--------------------------------|--------------|--|---------------------------------|
|                                                                                      | Arabinoxylan (n=15)                                                                      |              |                                |              |  | Microcrystalline Cellulose (n=16) |             |                                |              |  | Between Group<br>p value (adj.) |
|                                                                                      | Baseline                                                                                 | Week 6       | Within Group<br>p value (adj.) | Δ Taxa       |  | Baseline                          | Week 6      | Within Group<br>p value (adj.) | Δ Taxa       |  |                                 |
| <b>Phyla</b>                                                                         |                                                                                          |              |                                |              |  |                                   |             |                                |              |  |                                 |
| Firmicutes                                                                           | 65.76 ± 7.49                                                                             | 59.80 ± 5.76 | 0.761(0.903)                   | -5.95 ± 8.59 |  | 64.2 ± 10.0                       | 65.8 ± 9.05 | 0.143(0.457)                   | 1.68 ± 6.82  |  | 0.281(0.856)                    |
| Bacteroidetes                                                                        | 17.19 ± 6.87                                                                             | 21.90 ± 7.44 | 0.021(0.215)                   | -4.70 ± 5.56 |  | 19.9 ± 6.57                       | 21.8 ± 7.05 | 0.231(0.505)                   | 1.91 ± 8.84  |  | 0.519(0.931)                    |
| Actinobacteria                                                                       | 11.41 ± 8.74                                                                             | 13.17 ± 8.60 | 0.072(0.300)                   | 1.76 ± 5.01  |  | 7.67 ± 4.94                       | 6.6 ± 4.45  | 0.403(0.743)                   | -1.12 ± 4.26 |  | 0.065(0.416)                    |
| <b>Family</b>                                                                        |                                                                                          |              |                                |              |  |                                   |             |                                |              |  |                                 |
| <i>Erysipelotrichaceae</i>                                                           | 7.27 ± 6.25                                                                              | 3.82 ± 3.52  | <b>0.0001(0.004)</b>           | -3.45 ± 3.98 |  | 5.56 ± 5.09                       | 5.40 ± 4.05 | 0.820(0.957)                   | -0.17 ± 4.22 |  | <b>0.015(0.149)</b>             |
| <i>Lachnospiraceae</i>                                                               | 30.66 ± 6.60                                                                             | 30.20 ± 4.33 | 0.359(0.567)                   | -0.46 ± 7.86 |  | 26.7 ± 10.1                       | 30.4 ± 9.46 | <b>0.002(0.117)</b>            | 3.65 ± 7.54  |  | 0.188(0.731)                    |
| <i>Bifidobacteriaceae</i>                                                            | 5.41 ± 5.37                                                                              | 8.50 ± 7.15  | <b>0.0026(0.036)</b>           | 3.08 ± 4.20  |  | 3.68 ± 4.16                       | 3.3 ± 4.26  | 0.668(0.882)                   | -0.38 ± 2.86 |  | <b>0.017(0.149)</b>             |
| <b>Genera</b>                                                                        |                                                                                          |              |                                |              |  |                                   |             |                                |              |  |                                 |
| <i>Blautia</i>                                                                       | 3.03 ± 2.18                                                                              | 4.28 ± 2.21  | 0.025(0.223)                   | 1.24 ± 2.19  |  | 3.11 ± 3.1                        | 2.40 ± 2.02 | 0.463(0.806)                   | -0.64 ± 1.64 |  | <b>0.010(0.149)</b>             |
| <i>Clostridium XVIII</i>                                                             | 1.10 ± 1.14                                                                              | 0.40 ± 0.44  | <b>0.0003(0.0007)</b>          | -0.76 ± 0.85 |  | 0.78 ± 1.21                       | 1.37 ± 2.67 | 0.705(0.898)                   | 0.58 ± 1.55  |  | <b>0.011(0.149)</b>             |
| <i>Lachnospiracea incertae sedis</i>                                                 | 7.13 ± 4.42                                                                              | 5.24 ± 3.72  | 0.120(0.324)                   | -1.89 ± 5.59 |  | 5.57 ± 4.04                       | 7.95 ± 6.90 | 0.044(0.310)                   | 2.38 ± 5.15  |  | <b>0.017(0.149)</b>             |
| <i>Ruminococcus2</i>                                                                 | 2.10 ± 1.63                                                                              | 1.42 ± 1.32  | 0.041(0.258)                   | -0.67 ± 1.36 |  | 1.41 ± 0.73                       | 2.16 ± 1.53 | 0.028(0.289)                   | 0.74 ± 1.17  |  | <b>0.005(0.149)</b>             |
| <i>Prevotella</i>                                                                    | 0.99 ± 1.92                                                                              | 3.75 ± 7.66  | <b>0.0001(0.006)</b>           | 2.75 ± 6.19  |  | 4.25 ± 8.49                       | 5.10 ± 9.13 | 0.010(0.229)                   | 0.85 ± 4.97  |  | 0.740(0.959)                    |
| <i>Bifidobacterium</i>                                                               | 5.41 ± 5.37                                                                              | 8.50 ± 7.15  | <b>0.002(0.003)</b>            | 3.08 ± 4.20  |  | 3.68 ± 4.17                       | 3.29 ± 4.26 | 0.632(0.867)                   | -0.38 ± 2.86 |  | <b>0.017(0.149)</b>             |
| <i>Megamonas</i>                                                                     | 1.44 ± 4.21                                                                              | 2.21 ± 5.37  | 0.151(0.353)                   | 0.76 ± 1.60  |  | 0.14 ± 0.51                       | 0.31 ± 0.87 | 0.013(0.229)                   | 0.17 ± 0.48  |  | 0.598(0.931)                    |
| <i>Parasutterella</i>                                                                | 0.58 ± 0.88                                                                              | 0.54 ± 1.14  | 0.389(0.567)                   | -0.04 ± 0.55 |  | 0.40 ± 0.80                       | 0.66 ± 1.00 | <b>0.003(0.117)</b>            | 0.25 ± 0.53  |  | <b>0.011(0.149)</b>             |
| <b>Operational Taxonomic Units (OTU Number, closest hit in database, % identity)</b> |                                                                                          |              |                                |              |  |                                   |             |                                |              |  |                                 |
| OTU6, <i>Prevotella copri</i> , 99%                                                  | 0.95 ± 1.84                                                                              | 3.62 ± 7.41  | <b>0.0001(0.006)</b>           | 2.67 ± 6.08  |  | 3.61 ± 7.53                       | 4.41 ± 8.02 | 0.175(0.833)                   | 0.79 ± 5.24  |  | 0.1194(0.398)                   |
| OTU79, <i>Muribaculaceae</i>                                                         | 0.07 ± 0.21                                                                              | 0.14 ± 0.38  | <b>0.0001(0.006)</b>           | 0.07 ± 0.21  |  | 0.50 ± 1.84                       | 0.11 ± 0.45 | 0.596(0.932)                   | -0.38 ± 1.39 |  | <b>0.0003(0.036)</b>            |
| OTU11, <i>Subdoligranulum</i> sp.                                                    | 1.26 ± 1.67                                                                              | 2.41 ± 3.27  | <b>0.0020(0.042)</b>           | 1.14 ± 1.89  |  | 1.78 ± 1.89                       | 1.38 ± 1.39 | 0.781(0.977)                   | -0.39 ± 1.24 |  | 0.1880(0.480)                   |
| OTU21, <i>Faecalibacillus intestinalis/faecis</i> , 100%                             | 1.74 ± 1.25                                                                              | 0.81 ± 0.69  | <b>0.0026(0.042)</b>           | -0.92 ± 1.13 |  | 1.71 ± 1.44                       | 1.95 ± 2.52 | 0.433(0.833)                   | 0.23 ± 1.90  |  | <b>0.0105(0.105)</b>            |
| OTU38, <i>Phascolarctobacterium succinatutens</i> , 100%                             | 0.39 ± 0.95                                                                              | 0.77 ± 1.68  | <b>0.0043(0.042)</b>           | 0.38 ± 0.80  |  | 0.25 ± 1.00                       | 0.44 ± 1.78 | 0.322(0.671)                   | 0.19 ± 0.78  |  | <b>0.0063(0.105)</b>            |
| OTU4, <i>Bifidobacterium longum</i> , 100%                                           | 3.53 ± 4.35                                                                              | 7.04 ± 6.76  | <b>0.0020(0.042)</b>           | 3.51 ± 4.51  |  | 1.55 ± 2.24                       | 1.64 ± 3.96 | 0.375(0.833)                   | 0.09 ± 1.99  |  | <b>0.0105(0.105)</b>            |
| OTU46, <i>Clostridium leptum</i> , 100%                                              | 0.31 ± 0.77                                                                              | 0.56 ± 1.31  | <b>0.0043(0.042)</b>           | 0.25 ± 0.58  |  | 0.08 ± 0.08                       | 0.56 ± 1.35 | 0.403(0.833)                   | 0.47 ± 1.35  |  | <b>0.0105(0.105)</b>            |
| OTU53, <i>Bacteroides plebeius</i> , 98.76%                                          | 0.20 ± 0.55                                                                              | 0.56 ± 1.58  | <b>0.0043(0.042)</b>           | 0.35 ± 1.20  |  | 0.72 ± 2.66                       | 1.06 ± 2.97 | 0.297(0.833)                   | 0.34 ± 0.74  |  | 0.4700(0.723)                   |
| OTU56, <i>Bacteroides</i> sp.                                                        | 0.15 ± 0.66                                                                              | 0.84 ± 3.04  | <b>0.0043(0.042)</b>           | 0.68 ± 2.44  |  | BDL                               | BDL         | BDL                            | BDL          |  | BDL                             |
| OTU85, <i>Blautia obeum</i> , 100%                                                   | 0.43 ± 0.53                                                                              | 1.33 ± 1.30  | <b>0.0034(0.042)</b>           | 0.89 ± 1.31  |  | 0.55 ± 0.55                       | 0.43 ± 0.37 | 0.375(0.833)                   | -0.11 ± 0.46 |  | <b>0.0041(0.105)</b>            |
| OTU32, <i>Mollicutes</i>                                                             | 0.11 ± 0.43                                                                              | 0.35 ± 1.34  | <b>0.0084(0.076)</b>           | 0.23 ± 0.91  |  | 1.59 ± 3.91                       | 0.80 ± 1.95 | 0.073(0.671)                   | -0.79 ± 2.08 |  | <b>0.0090(0.105)</b>            |

**Additional file 3: Table S2. Continued**

| Taxonomic Group                                                                                  | Arabinoxylan (n=15) |              |                                |              | Microcrystalline Cellulose (n=16) |             |                                |              | Between Group<br>p value (adj.) |
|--------------------------------------------------------------------------------------------------|---------------------|--------------|--------------------------------|--------------|-----------------------------------|-------------|--------------------------------|--------------|---------------------------------|
|                                                                                                  | Baseline            | Week 6       | Within Group<br>p value (adj.) | Δ Taxa       | Baseline                          | Week 6      | Within Group<br>p value (adj.) | Δ Taxa       |                                 |
| OTU41, <i>Eubacterium oxidoreducens</i> , 99%                                                    | 0.96 ± 1.08         | 0.42 ± 0.48  | <b>0.0151(0.125)</b>           | -0.53 ± 0.70 | 1.07 ± 0.98                       | 0.85 ± 0.80 | 0.705(0.977)                   | -0.22 ± 0.71 | <b>0.0009(0.105)</b>            |
| OTU26, <i>Bacteroides ovatus</i> , 100%                                                          | 0.41 ± 0.91         | 0.98 ± 1.16  | <b>0.0181(0.129)</b>           | 0.57 ± 1.26  | 0.26 ± 0.28                       | 0.54 ± 0.69 | 0.024(0.356)                   | 0.31 ± 0.55  | 0.3182(0.578)                   |
| OTU5, <i>Ruminococcus bromii</i> , 100%                                                          | 1.25 ± 1.56         | 0.87 ± 1.31  | <b>0.0181(0.129)</b>           | -0.38 ± 0.90 | 2.98 ± 2.94                       | 2.78 ± 3.30 | 0.743(0.977)                   | -0.19 ± 1.74 | 0.0710(0.326)                   |
| OTU7, <i>Bacteroides uniformis</i> , 100%                                                        | 2.38 ± 1.99         | 1.68 ± 2.65  | <b>0.0021(0.143)</b>           | -0.70 ± 2.23 | 1.73 ± 2.22                       | 1.55 ± 1.60 | 0.820(0.977)                   | -0.17 ± 1.12 | 0.0780(0.326)                   |
| OTU65, <i>Ruminococcus lactaris</i> , 100%                                                       | 0.37 ± 0.65         | 0.09 ± 0.29  | 0.0353(0.185)                  | -0.27 ± 0.62 | 0.24 ± 0.32                       | 0.34 ± 0.41 | 0.073(0.671)                   | 0.11 ± 0.25  | <b>0.0072(0.105)</b>            |
| OTU432, <i>Bacteroides cellulosilyticus</i> , 98.76%                                             | 0.16 ± 0.44         | 1.09 ± 2.99  | 0.0255(0.150)                  | 0.93 ± 2.56  | 0.14 ± 0.27                       | 0.06 ± 0.13 | 0.252(0.833)                   | -0.08 ± 0.24 | <b>0.0105(0.105)</b>            |
| OTU31, <i>Blautia faecis</i> , 100%                                                              | 1.45 ± 1.63         | 1.64 ± 1.06  | 0.1876(0.360)                  | 0.19 ± 1.47  | 0.94 ± 0.65                       | 0.58 ± 0.45 | 0.015(0.356)                   | -0.36 ± 0.46 | <b>0.0105(0.105)</b>            |
| OTU10, <i>Holdemanella biformis</i> , 99.58%                                                     | 4.52 ± 5.95         | 2.31 ± 3.36  | 0.1069(0.248)                  | -2.20 ± 3.25 | 1.98 ± 2.81                       | 1.65 ± 2.48 | 0.018(0.356)                   | -0.33 ± 0.72 | 0.7700(0.906)                   |
| OTU116, <i>Eubacterium ramulus</i> , 100%                                                        | 0.22 ± 0.23         | 0.21 ± 0.29  | 0.6787(0.780)                  | -0.01 ± 0.23 | 0.11 ± 0.17                       | 0.19 ± 0.18 | 0.018(0.356)                   | 0.08 ± 0.15  | 0.0405(0.155)                   |
| OTU47, <i>Bacteroides xylanisolvens</i> , 100%                                                   | 0.26 ± 0.36         | 0.58 ± 1.01  | 0.4887(0.634)                  | 0.31 ± 0.95  | 0.33 ± 0.53                       | 0.88 ± 1.53 | 0.007(0.356)                   | 0.55 ± 1.09  | 0.0855(0.329)                   |
| OTU54, <i>Parasutterella excrementihominis</i> , 100%                                            | 0.58 ± 0.89         | 0.54 ± 1.15  | 0.3591(0.561)                  | -0.04 ± 0.55 | 0.38 ± 0.78                       | 0.64 ± 0.97 | 0.013(0.356)                   | 0.26 ± 0.54  | 0.0170(0.155)                   |
| <b>Co-Abundance Response Groups (CARGs) (Sum of relative abundance of OTUs within each CARG)</b> |                     |              |                                |              |                                   |             |                                |              |                                 |
| CARG1                                                                                            | 5.97 ± 4.97         | 12.9 ± 11.02 | <b>0.0034</b>                  | 6.98 ± 8.76  | 4.86 ± 3.70                       | 4.98 ± 4.72 | 0.97                           | 0.12 ± 2.64  | <b>0.0072</b>                   |
| CARG2                                                                                            | 2.56 ± 1.21         | 6.09 ± 6.09  | <b>0.0084</b>                  | 3.53 ± 5.30  | 2.92 ± 2.51                       | 3.22 ± 2.43 | 0.46                           | 0.29 ± 1.19  | <b>0.0170</b>                   |
| CARG3                                                                                            | 1.21 ± 1.58         | 2.48 ± 3.58  | <b>0.0200</b>                  | 1.27 ± 2.83  | 2.37 ± 2.51                       | 2.86 ± 2.94 | 0.07                           | 0.48 ± 1.65  | 0.4600                          |
| CARG4                                                                                            | 2.90 ± 4.09         | 3.94 ± 4.61  | 0.1600                         | 1.04 ± 2.57  | 3.29 ± 4.20                       | 2.85 ± 2.69 | 0.85                           | -0.43 ± 2.95 | 0.3100                          |
| CARG5                                                                                            | 1.94 ± 1.90         | 1.78 ± 1.42  | 0.7100                         | -0.15 ± 1.82 | 1.66 ± 1.64                       | 2.43 ± 2.86 | 0.14                           | 0.77 ± 2.27  | 0.2400                          |
| CARG6                                                                                            | 4.63 ± 3.59         | 6.34 ± 8.30  | <b>0.0200</b>                  | 1.70 ± 6.83  | 7.50 ± 7.18                       | 9.14 ± 7.84 | 0.43                           | 1.63 ± 5.76  | 0.4900                          |
| CARG7                                                                                            | 13.82 ± 8.19        | 8.21 ± 6.49  | <b>0.0200</b>                  | -5.60 ± 8.69 | 11.7 ± 5.93                       | 14.4 ± 7.73 | 0.25                           | 2.33 ± 6.20  | <b>0.0063</b>                   |

<sup>1</sup> Statistical significance of within-group shifts (Δ week 6-baseline) were determined by Wilcoxon tests, while between-group shifts (Δ arabinoxylan vs. Δ microcrystalline cellulose) were determined by Mann-Whitney tests. Data are presented as relative abundance, and were centered log-ratio (CLR) transformed prior to the statistical analyses. p values were adjusted by FDR, whereas FDR significance was set at q<0.15. BDL, below detection limit; Δ Taxa, absolute change in relative abundance from baseline to week 6.
