# Supplementary material for: Gut microbiota modulation with long-chain corn bran arabinoxylan in adults with overweight and obesity is linked to an individualized temporal increase in fecal propionate
Source: PubMed Central journal article supplement (PMC7439537; doi:10.1186/s40168-020-00887-w), 2020-08-19
Supplement: 40168_2020_887_MOESM5_ESM.pdf [file 40168_2020_887_MOESM5_ESM.pdf]

**Additional file 5: Table S3. Fecal pH, Moisture Content, and Concentrations and Percentages of Fecal Short-Chain Fatty Acids<sup>1</sup>.**

|                                      | Fecal pH, Moisture Content, and Short-Chain Fatty Acids (Mean ± Standard Deviation) |              |                                |              |                                   |              |                                |              |                                 |
|--------------------------------------|-------------------------------------------------------------------------------------|--------------|--------------------------------|--------------|-----------------------------------|--------------|--------------------------------|--------------|---------------------------------|
|                                      | Arabinoxylan (n=15)                                                                 |              |                                |              | Microcrystalline Cellulose (n=16) |              |                                |              | Between Group<br>p value (adj.) |
|                                      | Baseline                                                                            | Week 6       | Within Group<br>p value (adj.) | Δ SCFA       | Baseline                          | Week 6       | Within Group<br>p value (adj.) | Δ SCFA       |                                 |
| <b>Fecal pH</b>                      | 6.8 ± 0.5                                                                           | 6.7 ± 0.5    | 0.57(1.00)                     | -0.1 ± 0.6   | 6.8 ± 0.6                         | 7.0 ± 0.6    | 0.18(0.76)                     | 0.3 ± 0.8    | 0.095(0.31)                     |
| <b>Fecal moisture content (%)</b>    | 71.7 ± 7.3                                                                          | 72.4 ± 7.0   | 0.80(1.00)                     | 0.7 ± 6.7    | 72.2 ± 8.7                        | 69.9 ± 7.2   | 0.40(0.76)                     | -2.3 ± 11.2  | 0.52(0.70)                      |
| <b>Fecal Concentration (μmol/g)</b>  |                                                                                     |              |                                |              |                                   |              |                                |              |                                 |
| Total SCFAs                          | 145.3 ± 99.0                                                                        | 151.4 ± 80.7 | 0.59(1.00)                     | 6.2 ± 65.2   | 145.3 ± 111.9                     | 126.2 ± 55.2 | 0.59(0.76)                     | -19.0 ± 96.9 | 0.56(0.70)                      |
| Acetate                              | 90.2 ± 56.2                                                                         | 94.8 ± 50.9  | 0.99(1.00)                     | 4.6 ± 37.0   | 91.4 ± 63.6                       | 80.8 ± 30.3  | 0.32(0.76)                     | -10.6 ± 56.6 | 0.46(0.70)                      |
| Propionate                           | 31.2 ± 28.6                                                                         | 39.0 ± 26.0  | 0.15(0.53)                     | 7.8 ± 21.1   | 31.7 ± 32.4                       | 24.0 ± 13.5  | 0.40(0.76)                     | -7.7 ± 24.8  | 0.11(0.31)                      |
| Butyrate                             | 23.8 ± 18.4                                                                         | 17.6 ± 10.3  | 0.48(1.00)                     | -6.3 ± 16.7  | 22.3 ± 19.3                       | 21.4 ± 16.9  | 0.93(0.94)                     | -0.8 ± 21.9  | 0.59(0.70)                      |
| Valerate                             | 3.1 ± 1.6                                                                           | 3.1 ± 1.7    | 0.93(1.00)                     | -0.004 ± 1.1 | 3.5 ± 2.7                         | 3.1 ± 1.6    | 0.59(0.76)                     | -0.3 ± 2.4   | 0.76(0.77)                      |
| Total BCFAs                          | 7.8 ± 3.6                                                                           | 8.4 ± 4.6    | 0.71(1.00)                     | 0.6 ± 3.8    | 7.4 ± 3.6                         | 6.4 ± 2.5    | 0.43(0.76)                     | -1.1 ± 4.8   | 0.39(0.70)                      |
| Isobutyrate                          | 3.1 ± 1.1                                                                           | 3.4 ± 1.6    | 0.52(1.00)                     | 0.3 ± 1.5    | 2.9 ± 1.3                         | 2.6 ± 0.9    | 0.49(0.76)                     | -0.2 ± 1.8   | 0.26(0.61)                      |
| Isovalerate                          | 4.7 ± 2.5                                                                           | 5.0 ± 3.0    | 0.97(1.00)                     | 0.3 ± 2.4    | 4.6 ± 2.5                         | 3.7 ± 1.7    | 0.29(0.76)                     | -0.8 ± 3.2   | 0.46(0.70)                      |
| <b>Percentage of Total SCFAs (%)</b> |                                                                                     |              |                                |              |                                   |              |                                |              |                                 |
| Acetate                              | 62.7 ± 6.4                                                                          | 62.7 ± 6.7   | 0.97(1.00)                     | -0.04 ± 6.9  | 66.1 ± 6.1                        | 66.6 ± 9.2   | 0.78(0.92)                     | 1.0 ± 8.3    | 0.66(0.72)                      |
| Propionate                           | 20.7 ± 6.3                                                                          | 25.0 ± 6.8   | 0.04(0.19)                     | 4.3 ± 7.8    | 18.9 ± 4.2                        | 17.8 ± 5.6   | 0.23(0.76)                     | -1.4 ± 4.5   | <b>0.01(0.07)</b>               |
| Butyrate                             | 16.6 ± 5.0                                                                          | 12.3 ± 5.2   | <b>0.018(0.13)</b>             | -4.3 ± 6.4   | 15.0 ± 4.1                        | 15.9 ± 7.1   | 0.89(0.94)                     | 0.4 ± 7.0    | 0.08(0.31)                      |
| <b>Propionate-to-Butyrate Ratio</b>  | 1.4 ± 0.5                                                                           | 3.3 ± 4.6    | <b>0.004(0.06)</b>             | 2.0 ± 4.7    | 1.4 ± 0.6                         | 1.4 ± 0.7    | 0.50(0.76)                     | -0.1 ± 0.6   | <b>0.005(0.07)</b>              |

<sup>1</sup> Statistical significance of within-group shifts (Δ week 6-baseline) were determined by Wilcoxon tests, while between-group shifts (Δ arabinoxylan vs. Δ microcrystalline cellulose) were determined by Mann-Whitney tests. p values were adjusted by FDR, whereas FDR significance was set at  $q < 0.15$ . Δ SCFA, absolute change from baseline to week 6. BCFAs, branched short-chain fatty acids; SCFAs, short-chain fatty acids.
