# Supplementary material for: Gut microbiota modulation with long-chain corn bran arabinoxylan in adults with overweight and obesity is linked to an individualized temporal increase in fecal propionate
Source: PubMed Central journal article supplement (PMC7439537; doi:10.1186/s40168-020-00887-w), 2020-08-19
Supplement: 40168_2020_887_MOESM7_ESM.pdf [file 40168_2020_887_MOESM7_ESM.pdf]

Additional file 7: Figure S4.

**A**

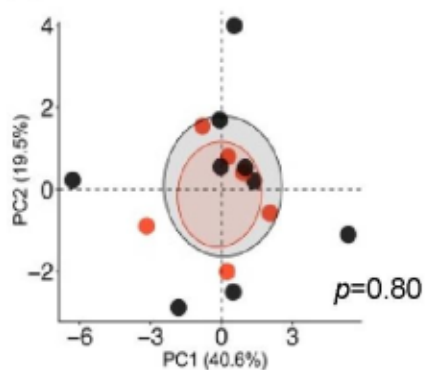

● W6-Responders ( $\Delta W6-W1 > 0$ )

**B**

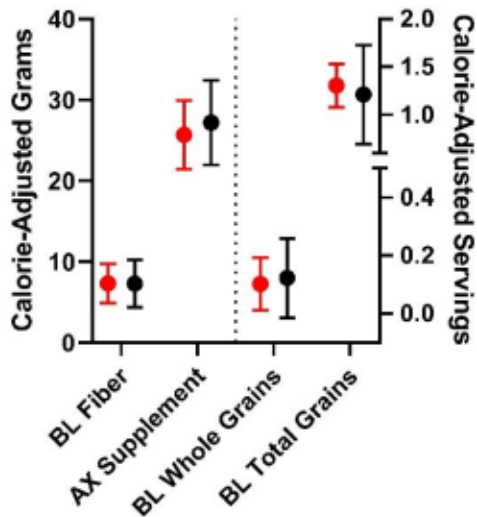

● W6-Nonresponders ( $\Delta W6-W1 < 0$ )
