# Supplementary material for: Gut microbiota modulation with long-chain corn bran arabinoxylan in adults with overweight and obesity is linked to an individualized temporal increase in fecal propionate
Source: PubMed Central journal article supplement (PMC7439537; doi:10.1186/s40168-020-00887-w), 2020-08-19
Supplement: 40168_2020_887_MOESM10_ESM.pdf [file 40168_2020_887_MOESM10_ESM.pdf]

**Additional file 10: Table S4.** Multiple Linear Regression Analyses Between Arabinoxylan-Induced Fecal SCFA Responses and Bacterial Features<sup>1</sup>.

|                                                    |                               | Fecal SCFA Concentration Response ( $\Delta$ week 6 - baseline; dependent variables) |                       |                          |               |                       |                     |               |                       |                     |        |
|----------------------------------------------------|-------------------------------|--------------------------------------------------------------------------------------|-----------------------|--------------------------|---------------|-----------------------|---------------------|---------------|-----------------------|---------------------|--------|
|                                                    |                               | Propionate                                                                           |                       |                          | Acetate       |                       |                     | Butyrate      |                       |                     |        |
|                                                    |                               | $\beta$ -Coef                                                                        | <i>p</i> value (adj.) | AICc                     | $\beta$ -Coef | <i>p</i> value (adj.) | AICc                | $\beta$ -Coef | <i>p</i> value (adj.) | AICc                |        |
| Baseline Microbiota                                | All OTUs                      | PC1                                                                                  | 2.86                  | <b>0.01(0.039)</b>       |               |                       |                     |               |                       |                     |        |
|                                                    |                               | PC2                                                                                  |                       |                          | 133.2         | -4.15                 | 0.03(0.056)         | 146.2         | -1.21                 | 0.05(0.07)          | 113.3  |
|                                                    |                               | PC3                                                                                  | 2.77                  | 0.03(0.06)               |               |                       |                     |               |                       |                     |        |
|                                                    | All CARGs                     | PC2                                                                                  | 2.75                  | 0.56(0.6)                | 141.1         | -8.38                 | 0.2 (0.24)          | 150           | 4.67                  | <b>0.02(0.048)</b>  | 111.3  |
|                                                    | Sig. OTUs                     | PC1                                                                                  |                       |                          | 134.5         | -8.46                 | 0.03(0.056)         | 150           | -2.85                 | <b>0.02(0.049)</b>  | 115.6  |
|                                                    |                               | PC2                                                                                  | 7.23                  | <b>0.02(0.049)</b>       |               | 2.30                  | 0.58(0.64)          |               | -0.80                 | 0.52(0.55)          |        |
|                                                    | CARGs                         | CARG5                                                                                | 5.54                  | 0.07(0.09)               |               | 10.16                 | <b>0.01(0.043)</b>  |               |                       |                     |        |
|                                                    |                               | CARG6                                                                                |                       |                          | 139.0         |                       |                     | 144.2         | -1.58                 | <b>0.014(0.043)</b> | 110.3  |
|                                                    | OTUs                          | CARG7                                                                                | 1.43                  | 0.03(0.056)              |               |                       |                     |               |                       |                     |        |
|                                                    |                               | OTU85 <i>B. obeum</i>                                                                | -21.86                | 0.03(0.056)              |               |                       |                     |               |                       |                     |        |
| OTU46 <i>C. leptum</i>                             |                               | -9.28                                                                                | 0.17(0.19)            | 139.5                    |               |                       | 147                 |               |                       | 110.7               |        |
|                                                    | OTU41 <i>E. oxidoreducens</i> |                                                                                      |                       |                          | -13.48        | 0.046(0.07)           |                     | -5.02         | <b>0.016(0.047)</b>   |                     |        |
| Shifts of Microbiota ( $\Delta$ week 1 - baseline) | All OTUs                      | PC1                                                                                  | -2.66                 | 0.03(0.06)               |               |                       |                     |               |                       |                     |        |
|                                                    |                               | PC2                                                                                  | -2.48                 | 0.07(0.09)               | 136.3         |                       |                     | 149.4         |                       |                     | 116.3  |
|                                                    |                               | PC3                                                                                  |                       |                          |               | 3.35                  | 0.14(0.17)          |               | 0.88                  | 0.20(0.25)          |        |
|                                                    | All CARGs                     | PC1                                                                                  |                       |                          | 132.13        | -5.28                 | 0.159(0.193)        | 152.9         | -2.14                 | 0.21(0.24)          | 120.62 |
|                                                    |                               | PC2                                                                                  | -9.57                 | <b>0.007(0.038)</b>      |               | -7.22                 | 0.33(0.375)         |               | -0.038                | 0.98(0.98)          |        |
|                                                    | Sig. OTUs                     | PC1                                                                                  | -6.99                 | <b>0.011(0.039)</b>      |               |                       |                     |               |                       |                     |        |
|                                                    |                               | PC2                                                                                  |                       |                          | 133.2         |                       |                     | 144.4         | 2.67                  | 0.08(0.10)          | 114.2  |
|                                                    | CARGs                         | PC3                                                                                  |                       |                          |               | 12.00                 | <b>0.01(0.039)</b>  |               |                       |                     |        |
|                                                    |                               | CARG1                                                                                | 1.89                  | <b>0.0045(0.03)</b>      |               |                       |                     | 148.6         | 0.482                 | 0.23(0.25)          | 116.2  |
|                                                    | OTUs                          | CARG7                                                                                |                       |                          | 131.1         | 2.02                  | 0.09(0.11)          |               |                       |                     |        |
| OTU6 <i>P. copri</i>                               |                               | -1.50                                                                                | 0.04(0.07)            |                          |               |                       |                     |               |                       |                     |        |
| OTU38 <i>P. succinatutens</i>                      |                               | 8.38                                                                                 | 0.05(0.07)            | 138.67                   |               |                       | 140.2               |               |                       | 103.1               |        |
|                                                    | OTU7 <i>B. uniformis</i>      |                                                                                      |                       |                          | 10.32         | <b>0.002(0.018)</b>   |                     |               |                       |                     |        |
|                                                    | OTU41 <i>E. oxidoreducens</i> |                                                                                      |                       |                          |               |                       |                     | 7.22          | <b>0.0006(0.0097)</b> |                     |        |
| Shifts of Microbiota ( $\Delta$ week 6 - baseline) | All OTUs                      | PC1                                                                                  | -4.23                 | <b>&lt;0.0001(0.005)</b> |               |                       |                     |               |                       |                     |        |
|                                                    |                               | PC2                                                                                  | -1.86                 | 0.046(0.07)              | 123.7         | 3.72                  | 0.10(0.12)          | 148.7         |                       |                     | 118.0  |
|                                                    |                               | PC3                                                                                  |                       |                          |               |                       |                     |               | 0.16                  | 0.80(0.81)          |        |
|                                                    | All CARGs                     | PC2                                                                                  | -10.89                | <b>0.001(0.014)</b>      | 128.95        | -12.72                | <b>0.018(0.048)</b> | 144.95        |                       |                     | 108.98 |
|                                                    |                               | PC3                                                                                  |                       |                          |               |                       |                     |               | 6.07                  | <b>0.007(0.038)</b> |        |
|                                                    | Sig. OTUs                     | PC1                                                                                  | 6.54                  | <b>0.0006(0.0097)</b>    | 125.0         | 8.05                  | <b>0.02(0.049)</b>  | 148.7         |                       |                     | 112.6  |
|                                                    |                               | PC2                                                                                  | 6.40                  | <b>0.005(0.03)</b>       |               | -3.92                 | 0.35(0.38)          |               | -3.14                 | 0.039(0.067)        |        |
|                                                    | CARGs                         | CARG1                                                                                | 1.63                  | <b>0.0016(0.018)</b>     |               | 1.64                  | 0.05(0.07)          |               |                       |                     |        |
|                                                    |                               | CARG2                                                                                |                       |                          | 128.7         | 0.11                  | 0.93(0.95)          | 151.6         |                       |                     | 109.4  |
|                                                    | OTUs                          | CARG3                                                                                |                       |                          |               |                       |                     |               | 2.13                  | <b>0.009(0.039)</b> |        |
| OTU85 <i>B. obeum</i>                              |                               | 9.76                                                                                 | <b>0.007(0.038)</b>   |                          |               |                       |                     |               |                       |                     |        |
| OTU11 <i>Subdoligranulum</i> sp.                   |                               |                                                                                      |                       | 132.3                    | 8.56          | 0.027(0.056)          | 145.8               |               |                       | 108.4               |        |
|                                                    | OTU41 <i>E. oxidoreducens</i> |                                                                                      |                       |                          |               |                       |                     | 8.48          | <b>0.006(0.035)</b>   |                     |        |

<sup>1</sup> Each model contains the best one or two predictors of PCs, CARGs, or significant OTUs selected by stepwise regression. All models were adjusted by sex/fiber dose. Quality of each model was evaluated by corrected Akaike information criterion (AICc). adj., FDR adjusted *p* values;  $\beta$ -Coef:  $\beta$ -Coefficient; CARGs, co-abundance response groups; PC, principle component; Sig. OTUs: significantly responding operational taxonomic units.
